# Supplementary material
Source: ML conference proceedings conference paper supplement (https://aclanthology.org/2021.acl-long.549)
Supplement: OptionalSupplementaryMaterial [file 2021.acl-long.549.OptionalSupplementaryMaterial.zip]

Archive with 3 entries (2 files):
- output (15).pdf
- __MACOSX/
- __MACOSX/._output (15).pdf
